# Supplementary material for: Forecasting the Influence of Climate Change on Agroecosystem Services: Potential Impacts on Honey Yields in a Small-Island Developing State
Source: Hindawi journal article supplement (doi:10.1155/2012/951215), 2012-01-01
Supplement: f1 [file 951215.f1.doc]

**Appendix**

History of honey production in the island of Puerto Rico

Honey bees, most likely *Apis mellifera mellifera* and *A. mellifera iberica,* were introduced to the island by the mid 1700’s . Honey bees escaped and became naturalized, establishing their colonies in tree cavities from where honey and wax was collected. Subsequent sources from the late 1800’s, most likely reflect the introduction of *Apis mellifera ligustica* or Italian honey bees, describe the production of honey and wax from managed colonies as well as pamphlets with instructions for beekeeping .

Starting in the 1900’s the US population and agricultural census data kept key information about beekeeping . The censuses have recorded information on the same items and they are comparable in spite of changes in the units, schedule, and sampling methods used . The combination of several historical sources suggests that the census data published ≤1974 provides reliable data on number of farms and honey yields. Starting in 1978 the published agricultural censuses reported data for ≤8 municipalities, which is in sharp contrast with the ≥23 municipalities reported by earlier published censuses and the DAPR data. We can distinguish four periods in the history of beekeeping in the island:

Period I (1900-1935). An increase in the number of farms with apiaries, quantity of honey produced, honey yields, and export of honey and beeswax to supply the United States and international markets characterizes this period . In fact, the quantity of honey (704,179 L) and number of colonies (41,093) reported in 1920 were the highest ever seen in the island . A combination of several factors, including the establishment of a research and extension program in tropical beekeeping, the adoption of this crop by coffee farmers, and high honey prices may explain the success of this activity in the island . Coffee farmers benefited from beekeeping both because honey bees seemed to have a positive impact on coffee yields, and because honey and beeswax sales provided an additional source of income that required little investment; nevertheless, overstocking, poor queen management, and heavy rains were a concern among beekeepers . Hurricane San Cipriano hit the island in 1932 contributing to the loss of 1,734 bee colonies and 3,730 L of honey yet it did not seem to deter beekeeping activity in coming years .

Period II (1935-1950). During this period the number of farms with apiaries fluctuated around the maximum number recorded for the island. Yields are slightly lower than in the previous period at a time when honey prices dropped. This period coincides with Second World War and legislation that granted the island of Puerto Rico Puerto Rico’s its current status as a commonwealth of the United States.

Period III (1950-1974). A sharp decline in the number of farms with bee colonies and a further drop in honey yields and maximum yields is observed (Fig. 1a, 1b). This decline coincides with two main events. First, the large-scale abandonment of farms during the late 1940’s and early 1950’s time during which Puerto Rico experienced a shift from an agriculture to a manufacture based economy and the exodus of thousands of Puerto Ricans to the United States . The large-scale abandonment of farmland and subsequent forest re-growth could have affected the quality and quantity, as well as the spatial distribution, of the resources used by honey bees. Evidence for this comes from a study conducted in Costa Rica in similar environments that showed that the abundance of *Apis mellifera* was greatest in an agricultural matrix than at forest edges . Second, Hurricane Hazel hit the island in 1954 and produced some of the heaviest rains seen in decades. Damage to the island exceeded that of all previous meteorological events since 1899 .

Period IV (1974-present). This period is characterized by a small number of farms with apiaries and low honey yields, including variability. One report from the early 1980’s indicates that beekeepers were not exploiting adequately honey’s local market and that there seemed to exist a great potential for the expansion of this activity in the island . Trends in this period may reflect the combination of three factors. First, the replacement of shade by sunlight coffee plantations , the introduction of diseases including foulbrood and *Varroa* mites around 1989 , the invasion by Africanized bees around 1994 , and the impact of Hurricane Georges in 1998 . This hurricane destroyed roughly 75% and 95% of the coffee and plantain crops, respectively, and according to one of the island’s main beekeepers the damage was extended to the existing apiaries [R. Caraballo, per. com.]. Interestingly, the presence of Africanized honey bees may have ameliorated the effects of this hurricane because of their capacity to survive food shortages . Lastly, beekeeping, albeit with some exceptions, has become a hobby whereby little or no management is provided to colonies because Africanized bees are less likely to provide a honey surplus.

**References**

[1] Colón, E. D., *Agricultura de Puerto Rico antes de 1898*,Tipografía Cantero, Fernández & Co., Inc., San Juan, Puerto Rico, 1930.

[2] K. E. Clarke, et al., "Origin of honeybees (*Apis mellifera* L.) from the Yucatan peninsula inferred from mitochondrial DNA analysis"*.* *Molecular Ecology*, vol. 10, no., pp. 1347-1355, 2001.

[3] U. S. Bureau of the Census, "U. S. Census of Agriculture: 1969", United States Department of Commerce: United States Government Printing Office, Washington, DC, United States, 1971.

[4] U. S. Bureau of the Census, "Thirteenth Census of the United States taken in the year 1910 - Porto Rico", United States Department of Commerce United States Goverment Printing Office, Washington, DC, United States, 1913.

[5] U. S. Bureau of the Census, "Fourtheenth Census of the Untied States taken in the year 1920. Agriculture: Porto Rico", United States Department of Commerce: United States Government Printing Office, Washington, DC, United States, 1921.

[6] U. S. Bureau of the Census, "Census of Puerto Rico: 1935. Population and Agriculture", Puerto Rico Reconstruction Administration: United States Government Printing Office, Washington, DC, United States, 1938.

[7] U. S. Bureau of the Census, "Sixteenth Census of the United States: Agriculture: 1940. Territories and Possessions", United States Department of Commerce United States Goverment Printing Office, Washington, DC, United States, 1943.

[8] U. S. Bureau of the Census, "United States Census of Agriculture: 1950. Territories and Possessions - Volume I Part 34, American Samoa, Guam, Hawaii, Puerto Rico and Virgin Islands", United States Department of Commerce: United States Government Printing Office, Washington, DC, United States, 1952.

[9] U. S. Bureau of the Census, "U. S. Census of Agriculture: 1959. Volume 1, Municipalities, Part 53, Puerto Rico", United States Department of Commerce: United States Government Printing Office, Washington, DC, United States, 1961.

[10] U. S. Bureau of the Census, "U. S. Census of Agriculture: 1964. Volume 1, Municipalities, Part 52, Puerto Rico", United States Department of Commerce: United States Government Office, Washington, DC, United States, 1967.

[11] U. S. Bureau of the Census, "U. S. Census of Agriculture: 1974. Volume 1, Municipalities, Part 52, Puerto Rico", United States Department of Commerce: United States Government Printing Office, Washington, DC, United States, 1977.

[12] U. S. Bureau of the Census, "U. S. Census of Agricutlure: 1978. Volume 1, State and County Data, Part 52, Puerto Rico", United States Department of Commerce: United States Government Printing Office, Washington, DC, United States, 1980.

[13] U. S. Bureau of the Census, "U. S. Census of Agriculture: 1982. Volume 1, Geographic Area Series, Part 52, Puerto Rico", United States Department of Commerce: United States Government Printing Office, Washington, DC, United States, 1984.

[14] U. S. Bureau of the Census, "U. S. Census of Agriculture: 1987. Volume 1, Geographic Area Series, Part 52, Puerto Rico", United States Department of Commerce: United States Government Printing Office, Washington, DC, United States, 1989.

[15] U. S. Bureau of the Census, "U. S. Census of Agriculture: 1992. Volume 1, Geographic Areas Series, Part 52, Puerto Rico", United States Department of Commerce: United States Government Printing Office, Washington, DC, United States, 1993.

[16] National Agricultural Statistics Service, "U. S. Census of Agriculture: 1998. Volume 1, Geographic Series, Part 52, Puerto Rico ", United States Department of Agriculture: United States Government Printing Office, Washington, DC, US, 1998.

[17] National Agricultural Statistics Service, "U. S. Census of Agriculture: 2001. Volume 1, Geographic Series, Part 52, Puerto Rico ", United States Department of Agriculture: United States Government Printing Office, Washington, DC, US, 2004.

[18] National Agricultural Statistics Service, "U. S. Census of Agriculture: 2007. Volume 1, Geographic Series, Part 52, Puerto Rico", United States Department of Agriculture: United States Government Printing Office, Washington, DC, US, 2009.

[19] U. S. Bureau of the Census, "Fifteenth Census of the United States: 1930. Outlying Territories and Possessions - Puerto Rico", United States Department of Commerce: Washington Government Printing Office, Washington, DC, United States, 1932.

[20] Porto Rico Governor, "Annual Report of the Governor of Porto Rico": Washington, United States, 1914.

[21] Puerto Rico Governor, "Annual Report of the Governor of Puerto Rico": Washington, United States, 1916.

[22] Puerto Rico Governor, "Annual Report of the Governor of Puerto Rico": Washington, United States, 1922.

[23] F. J. Sein, "Las Abejas de los Cafetales"*.* *Puerto Rico Agricultural Station Circular No. 79*, vol., no., 1923.

[24] W. V. Tower, "Beekeeping in Puerto Rico"*.* *Porto Rico Agricultural Experiment Station*, vol. Circular No. 13, no., 1911.

[25] W. V. Tower, "Bees in Porto Rico"*.* *Porto Rico Progress*, vol., no., pp. 69-79, 1911.

[26] R. H. van Zwaluwenburg and R. Vidal, "Rearing queen bees in Porto Rico under the supervision of States relation Service"*.* *Porto Rico Agricultural Experiment Station*, vol. Circular No. 16, no., 1918.

[27] E. F. Phillips, "La Apicultura Portorriqueña"*.* *Estación Experimental Agrícola de Puerto Rico*, vol. Boletín No. 15, no., 1915.

[28] L. Iches, *Tratado Práctico de Apicultura. La Abeja Doméstica*,Casa Editorial Garnier Hermanos, Paris, France, 1917.

[29] M. D. Leonard, "Entomology in Puerto Rico during the past decade"*.* *Journal of Economic Entomology*, vol. 24, no., pp. 141-151, 1931.

[30] Puerto Rico Governor, "Annual Report of the Governor of Puerto Rico": Washington, United States. pp. 158-159, 1933.

[31] J. L. Dietz, *Economic History of Puerto Rico: Institutional Change and Capitalist Development*,Princeton University Press, Princeton, New Jersey, US, 1986.

[32] T. K. Rudel, M. Perez-Lugo, and H. Zichal, "When fields revert to forest: Development and spontanenous reforestation in post-war Puerto Rico"*.* *Professional Geographer*, vol. 52, no., pp. 386-397, 2000.

[33] H. R. Grau, et al., "The ecological consequences of socioeconomic and land-use changes in postagriculture Puerto Rico"*.* *Bioscience*, vol. 53, no. 12, pp. 1159-1168, 2003.

[34] B. J. Brosi, G. C. Daily, and P. R. Ehrlich, "Bee community shifts with landscape context in a tropical countryside"*.* *Ecological Applications*, vol. 17, no., pp. 418-430, 2007.

[35] R. L. Higgs, "Severe floods of October 12-15, 1954 in Puerto Rico"*.* *Monthly Weather Review*, vol. October 1954, no., pp. 301-304, 1954.

[36] D. M. Caron, "A look at beekeeping in Puerto Rico"*.* *American Bee Journal*, vol. 125, no., pp. 262-263, 1985.

[37] C. Domínguez Cristóbal, *Panorama Histórico Forestal de Puerto Rico*,Editorial de la Universidad de Puerto Rico, San Juan, Puerto Rico, 2000.

[38] L. I. de Guzman, T. E. Rinderer, and J. A. Stelzer, "DNA evidence of the origin of *Varroa jacobsoni* Oudemans in the Americas"*.* *Biochemical Genetics*, vol. 35, no., pp. 327-335, 1997.

[39] B. Rivera-Marchand, "Africanized Bees in Puerto Rico", in *Biology*University of Puerto Rico-Rio Piedras: San Juan, Puerto Rico. pp. 100, 2006.

[40] B. Rivera-Marchand, T. Giray, and E. Guzmán-Novoa, "The cost of defense in social insects: Insights from the honey bee"*.* *Entomologia Experimentalis et Applicata*, vol., no., pp. 1-10, 2008.

[41] J. L. Guiney, "Preliminary Report - Hurricane Georges 12 September - 01 October 1998", National Hurricane Center: Miami, Florida, US, 1999.

[42] M. L. Winston, "The biology and management of Africanized honey bees"*.* *Annual Review of Entomology*, vol. 37, no., pp. 173-193, 1992.

[43] M. L. Winston, O. R. Taylor, and G. W. Otis, "Some differences between temperate European and tropical African and South American honey bees"*.* *Bee World*, vol. 64, no., pp. 12-21, 1983.

[44] E. Guzman-Novoa and J. L. Uribe-Rubio, "Honey production by European, Africanized and hybrid honey bee (*Apis mellifera*) colonies in Mexico"*.* *American Bee Journal*, vol. 144, no. 4, pp. 318-320, 2004.
